# Supplementary material for: Increased Rab35 expression is a potential biomarker and implicated in the pathogenesis of Parkinson's disease
Source: PubMed Central journal article supplement (PMC5342336; doi:10.18632/oncotarget.11090), 2016-08-05
Supplement: oncotarget-07-54215-s001.pdf [file oncotarget-07-54215-s001.pdf]

## Increased Rab35 expression is a potential biomarker and implicated in the pathogenesis of Parkinson's disease

### Supplementary Material

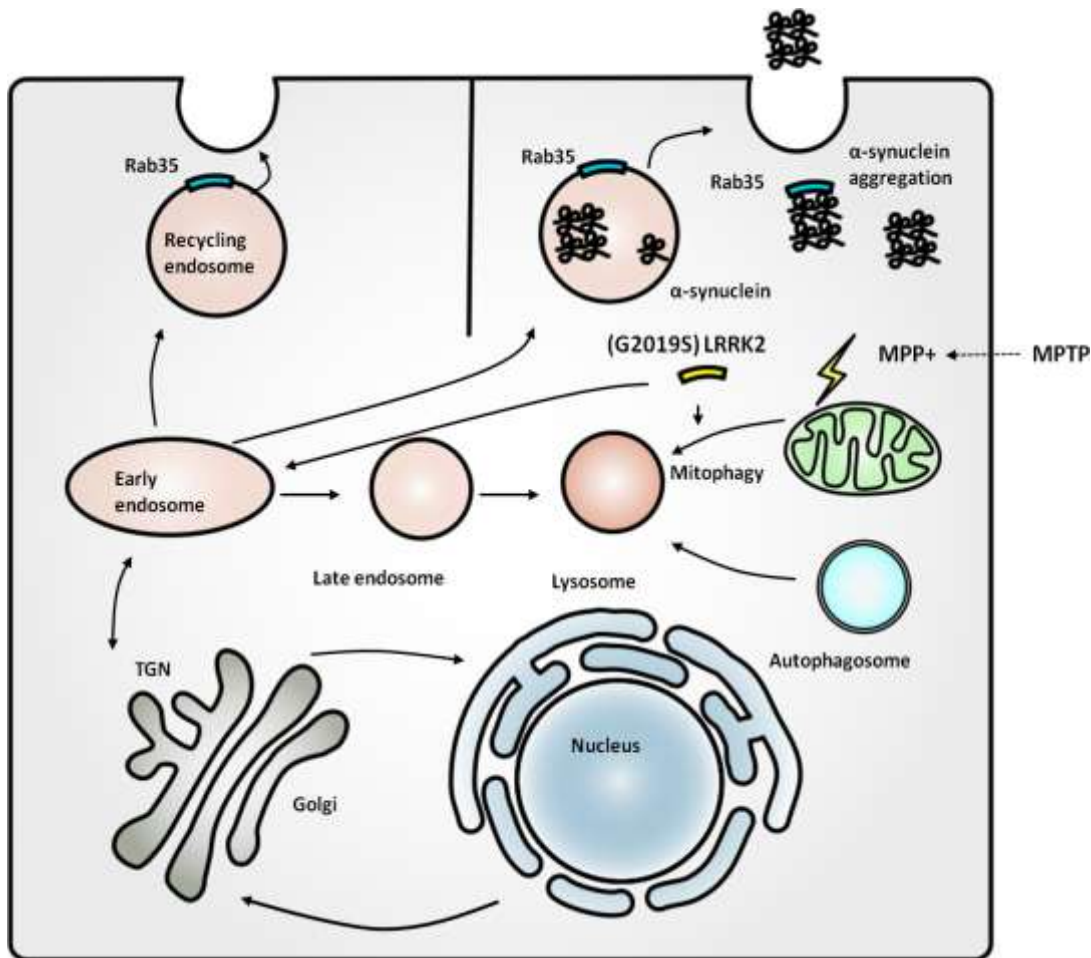

**Supplemental Figure 1: Illustration of the possible mechanism underlying the role of Rab35 in pathogenesis of PD.** Left panel: under a normal condition, Rab35 is localized in recycling endosome trafficking to the cell surface. Right panel: under the PD condition, the dysfunction of protein degradation results in the sequestration of abnormal proteins in Rab35 localized endosome. Overexpression of Rab35 promotes the aggregation of  $\alpha$ -Syn and secretion of  $\alpha$ -Syn to the intercellular space.

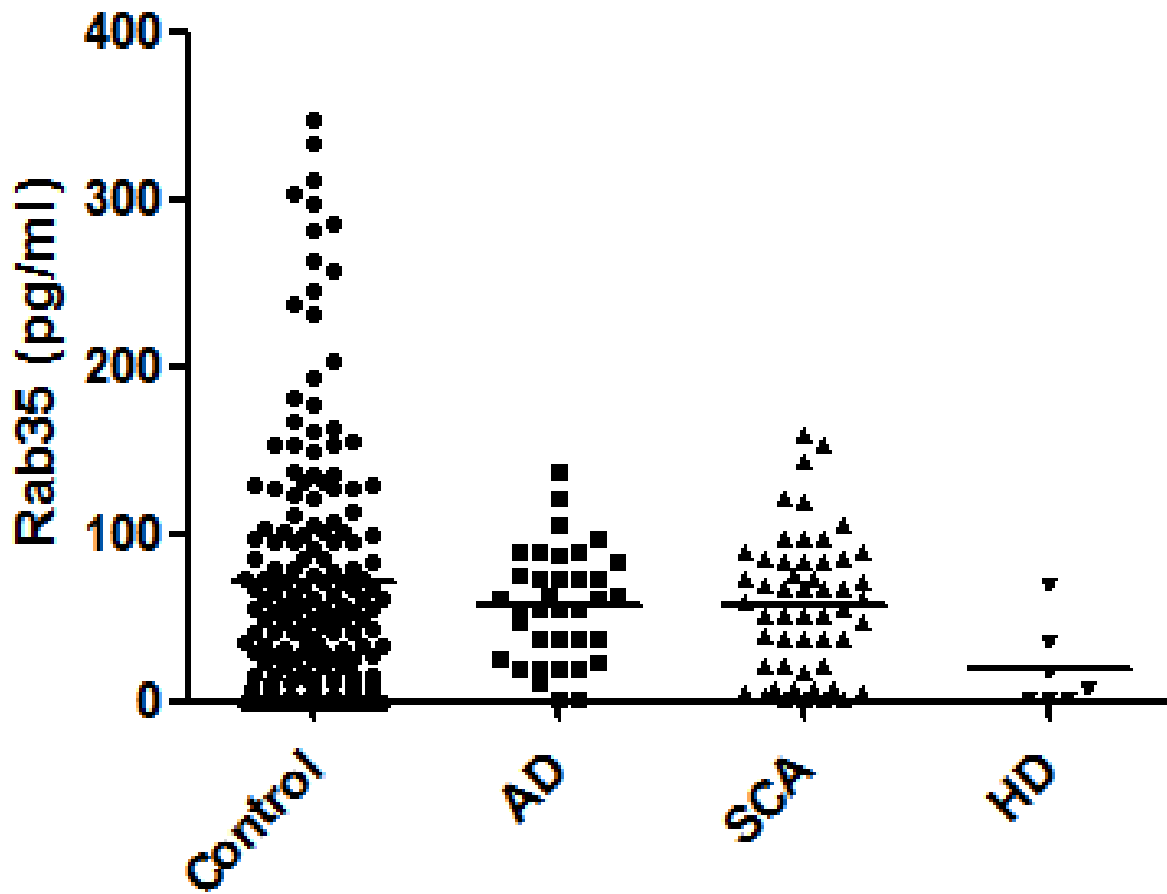

**Supplemental Figure 2: The serum level of Rab35 is not significantly increased in patients with Alzheimer's disease (AD), spinocerebellar ataxia (SCA) or Huntington's disease (HD).** The dot plot shows the serum level of Rab35 in healthy control subjects (n=177), AD patients (n=36), SCA patients (n=53) or HD patients (n=7).

**Supplemental Table 1: Demographic data and Rab35 serum levels of patients and control subjects**

| Group                      | Controls         | PSP              | MSA              | PD                | PD                 |                   |
|----------------------------|------------------|------------------|------------------|-------------------|--------------------|-------------------|
| AAO                        |                  |                  |                  |                   | AAO $\leq$ 50      | AAO>50            |
| N                          | 177              | 46               | 80               | 213               | 32                 | 181               |
| Gender (M / F)             | 99 / 88          | 25 / 21          | 35 / 45          | 107 / 106         | 17 / 15            | 90 / 91           |
| Age (years)*               | 61.60 $\pm$ 0.94 | 61.98 $\pm$ 1.13 | 57.75 $\pm$ 0.9  | 62.12 $\pm$ 0.94  | 35.91 $\pm$ 1.54   | 66.75 $\pm$ 0.59  |
| Serum Rab35 level (pg/ml)* | 70.51 $\pm$ 5.72 | 71.22 $\pm$ 9.37 | 58.37 $\pm$ 8.22 | 131.30 $\pm$ 9.67 | 210.35 $\pm$ 28.29 | 117.32 $\pm$ 9.90 |

PSP, progressive supranuclear palsy; MSA, multiple system atrophy; PD, Parkinson's disease

\* Mean  $\pm$  SEM

**Supplemental Table 2: Identification of serum proteins differentially expressed between NC and PD.**

For Table S2, please see the attached Excel file
